# Supplementary material
Source: ML conference proceedings conference paper supplement (https://openaccess.thecvf.com/content/CVPR2021/html/Morgado_Audio-Visual_Instance_Discrimination_CVPR_2021_paper.html)
Supplement: Supplementary file 1 [file Morgado_Audio-Visual_Instance_Discrimination_CVPR_2021_supplemental.pdf]

# Supplementary Material: Audio-Visual Instance Discrimination with Cross-Modal Agreement

## A. Experimental setup

**Architecture details** The architecture details of the video and audio networks used in the analysis experiments are shown in Table 5, and those used for comparison to prior work is shown in Table 6.

**Pre-training hyper-parameters** Optimization and data augmentation hyper-parameters for AVID and CMA pre-training are provided in Table 3.

**Action recognition hyper-parameters** Optimization and data augmentation hyper-parameters for action recognition tasks are provided in Table 4.

**Video pre-processing** Video clips are extracted at 16 fps and augmented with standard techniques, namely random multi-scale cropping with 8% minimum area, random horizontal flipping and color and temporal jittering. Color jittering hyper-parameters are shown in Table 3 for pre-training and Table 4 for transfer into downstream tasks.

**Audio pre-processing** Audio signals are loaded at 24kHz, instead of 48kHz, because a large number of Audioset audio samples do not contain these high frequencies. The spectrogram is computed by taking the FFT on 20ms windows with either 10ms (§4, §5) or 20ms (§6) hop-size. We then convert the spectrogram to a log scale, and Z-normalize its intensity using mean and standard deviation values computed on the training set. We use volume and temporal jittering for data augmentation. Volume jittering is accomplished by multiplying the audio waveform by a constant factor randomly sampled between 0.9 and 1.1, and applied uniformly over time. Temporal jittering is done by randomly sampling the audio starting time within 0.5s of the video, and randomly selecting the total audio duration between 1.4s and 2.8s and rescaling back to the expected number of audio frames.

## B. Longer AVID pre-training

To ensure that the benefits of CMA are not caused by longer training, we trained Cross-AVID for the same number

**Table 1:** Top-1 accuracy of linear probing on Kinetics evaluated after 200 and 400 epochs of Cross-AVID training.

| Method              | block1 | block2 | block3 | block4 | Best  |
|---------------------|--------|--------|--------|--------|-------|
| Cross-AVID (ep 200) | 19.84  | 26.87  | 34.64  | 39.87  | 39.87 |
| Cross-AVID (ep 400) | 19.80  | 26.98  | 34.81  | 39.95  | 39.95 |

**Table 2:** Top-1 accuracy of linear probing of memory representations (video, audio and both concatenated).

| Method            | Video Mem         | Audio Mem         | Combined Mem      |
|-------------------|-------------------|-------------------|-------------------|
| <b>Cross-AVID</b> | 29.01±0.14        | 19.67±0.09        | 34.68±0.15        |
| <b>CMA</b>        | <b>34.00±0.25</b> | <b>21.98±0.11</b> | <b>38.91±0.14</b> |

of epochs as AVID+CMA. The Cross-AVID performance on Kinetics after 200 and 400 training epochs are shown in Table 1. Cross-AVID transfer performance seem to have already saturated after 200 epochs of pre-training.

## C. CMA calibration

To further study the benefits effect of the CMA procedure, we measured the classification performance of memory representations obtained with both AVID and CMA trained on the Kinetics dataset. We randomly split the 220K training samples, for which memory representations are available, into a train/validation set (70/30% ratio). We then train a linear classifier on the training set (using either video, audio or the concatenation of both, ConvNet is kept fixed), and evaluate the performance on the validation set. The train/validation splits are sampled 5 times and average performance is reported. The top-1 accuracies are shown in Table 2.

**Table 3:** Pre-training optimization hyper-parameters. CMA models are initialized by the AVID model obtained at epoch 200. bs batch size; lr learning rate; wd weight decay; ep number of epochs; es number of samples per epoch; msc - multi-scale cropping; hf - horizontal flip probability; bj/sj/cj/hj - brightness/saturation/contrast/hue jittering intensity.

| Method           | DB       | bs | lr   | wd   | ep  | es    | msc | hf  | bj  | sj  | cj  | hj  |
|------------------|----------|----|------|------|-----|-------|-----|-----|-----|-----|-----|-----|
| AVID (§4)        | Audioset | 32 | 5e-4 | 1e-5 | 400 | 1e5   | ✓   | 0.5 | 0.4 | 0.4 | 0.4 | 0.2 |
| AVID (§6)        | Audioset | 32 | 5e-4 | 1e-5 | 200 | 1.8e6 | ✓   | 0.5 | 0.4 | 0.4 | 0.4 | 0.2 |
| AVID (§6)        | Kinetics | 32 | 2e-4 | 1e-5 | 300 | 2.4e5 | ✓   | 0.5 | 0.4 | 0.4 | 0.4 | 0.2 |
| CMA (§5.3, §5.4) | Audioset | 32 | 5e-4 | 1e-5 | 200 | 1e5   | ✓   | 0.5 | 0.4 | 0.4 | 0.4 | 0.2 |
| CMA (§6)         | Audioset | 32 | 5e-4 | 1e-5 | 200 | 1.8e6 | ✓   | 0.5 | 0.4 | 0.4 | 0.4 | 0.2 |
| CMA (§6)         | Kinetics | 32 | 2e-4 | 1e-5 | 300 | 2.4e5 | ✓   | 0.5 | 0.4 | 0.4 | 0.4 | 0.2 |

**Table 4:** Transfer learning optimization and data augmentation hyper-parameters. bs - batch size; lr - learning rate; wd - weight decay; ep - number of epochs; es - number of samples per epoch; gm - learning rate decay factor; mls - milestones for learning rate decay; msc - multi-scale cropping; hf - horizontal flip probability; bj/sj/cj/hj - brightness/saturation/contrast/hue jittering intensity.

| DB                | input size        | bs | lr   | wd | ep  | es    | gm  | mls        |
|-------------------|-------------------|----|------|----|-----|-------|-----|------------|
| Kinetics (§4, §5) | $16 \times 112^2$ | 32 | 1e-4 | 0. | 20  | 1e4   | 0.3 | 8,12,15,18 |
| UCF (§6)          | $8 \times 224^2$  | 32 | 1e-4 | 0. | 160 | 1e4   | 0.3 | 60,100,140 |
| UCF (§6)          | $32 \times 224^2$ | 16 | 1e-4 | 0. | 80  | 1e4   | 0.3 | 30,50,70   |
| HMDB (§6)         | $8 \times 224^2$  | 32 | 1e-4 | 0. | 250 | 3.4e3 | 0.3 | 75,150,200 |
| HMDB (§6)         | $32 \times 224^2$ | 16 | 1e-4 | 0. | 100 | 3.4e3 | 0.3 | 30,60,80   |

| DB                | msc | hf  | bj  | sj  | cj  | hj  |
|-------------------|-----|-----|-----|-----|-----|-----|
| Kinetics (§4, §5) | ✓   | 0.5 | 0.  | 0.  | 0.  | 0.  |
| UCF (§6)          | ✓   | 0.5 | 0.4 | 0.4 | 0.4 | 0.2 |
| HMDB (§6)         | ✓   | 0.5 | 1.  | 1.  | 1.  | 0.2 |

**Table 5:** Architecture details of R(2+1)D video network and Conv2D audio network for analysis experiments (§4, §5.3, §5.4). The video network is based of R(2+1)D convolutions, and the audio on 2D convolutions. Both video and audio networks use ReLU activations and batch normalization at each layer.  $X_s$  spatial activation size,  $X_t$  temporal activation size,  $X_f$  frequency activation size,  $C$  number of channels,  $K_s$  spatial kernel size,  $K_t$  temporal kernel size,  $K_f$  frequency kernel size,  $S_s$  spatial stride,  $S_t$  temporal stride,  $S_f$  frequency stride.

| Video Network |       |       |     |       |       |       |       |
|---------------|-------|-------|-----|-------|-------|-------|-------|
| Layer         | $X_s$ | $X_t$ | $C$ | $K_s$ | $K_t$ | $S_s$ | $S_t$ |
| video         | 112   | 16    | 3   | -     | -     | -     | -     |
| conv1         | 56    | 16    | 64  | 7     | 3     | 2     | 1     |
| block2.1      | 56    | 16    | 64  | 3     | 3     | 1     | 1     |
| block2.2      | 56    | 16    | 64  | 3     | 3     | 1     | 1     |
| block3.1      | 28    | 8     | 128 | 3     | 3     | 2     | 2     |
| block3.2      | 28    | 8     | 128 | 3     | 3     | 1     | 1     |
| block4.1      | 14    | 4     | 256 | 3     | 3     | 2     | 2     |
| block4.2      | 14    | 4     | 256 | 3     | 3     | 1     | 1     |
| block5.1      | 7     | 2     | 512 | 3     | 3     | 2     | 2     |
| block5.2      | 7     | 2     | 512 | 3     | 3     | 1     | 1     |
| max pool      | 1     | 1     | 512 | 7     | 2     | 1     | 1     |
| fc1           | -     | -     | 512 | -     | -     | -     | -     |
| fc2           | -     | -     | 512 | -     | -     | -     | -     |
| fc3           | -     | -     | 128 | -     | -     | -     | -     |

| Audio Network |       |       |     |       |       |       |       |
|---------------|-------|-------|-----|-------|-------|-------|-------|
| Layer         | $X_f$ | $X_t$ | $C$ | $K_f$ | $K_t$ | $S_f$ | $S_t$ |
| audio         | 129   | 100   | 1   | -     | -     | -     | -     |
| conv1         | 65    | 50    | 64  | 7     | 7     | 2     | 2     |
| block2.1      | 65    | 50    | 64  | 3     | 3     | 1     | 1     |
| block2.2      | 65    | 50    | 64  | 3     | 3     | 1     | 1     |
| block3.1      | 33    | 25    | 128 | 3     | 3     | 2     | 2     |
| block3.2      | 33    | 25    | 128 | 3     | 3     | 1     | 1     |
| block4.1      | 17    | 13    | 256 | 3     | 3     | 2     | 2     |
| block4.2      | 17    | 13    | 256 | 3     | 3     | 1     | 1     |
| block5.1      | 17    | 13    | 512 | 3     | 3     | 1     | 1     |
| block5.2      | 17    | 13    | 512 | 3     | 3     | 1     | 1     |
| max pool      | 1     | 1     | 512 | 17    | 13    | 1     | 1     |
| fc1           | -     | -     | 512 | -     | -     | -     | -     |
| fc2           | -     | -     | 512 | -     | -     | -     | -     |
| fc3           | -     | -     | 128 | -     | -     | -     | -     |

**Table 6:** Architecture details of R(2+1)D video network and Conv2D audio network for comparison to prior work (§6). The video network is based of R(2+1)D convolutions, and the audio on 2D convolutions. Both video and audio networks use ReLU activations and batch normalization at each layer.  $X_s$  spatial activation size,  $X_t$  temporal activation size,  $X_f$  frequency activation size,  $C$  number of channels,  $K_s$  spatial kernel size,  $K_t$  temporal kernel size,  $K_f$  frequency kernel size,  $S_s$  spatial stride,  $S_t$  temporal stride,  $S_f$  frequency stride.

| Video Network     |       |       |     |       |       |       |       |
|-------------------|-------|-------|-----|-------|-------|-------|-------|
| Layer             | $X_s$ | $X_t$ | $C$ | $K_s$ | $K_t$ | $S_s$ | $S_t$ |
| <b>video</b>      | 224   | 8     | 3   | -     | -     | -     | -     |
| <b>conv1</b>      | 112   | 8     | 64  | 7     | 3     | 2     | 1     |
| <b>max-pool</b>   | 56    | 8     | 64  | 3     | 1     | 2     | 1     |
| <b>block2.1.1</b> | 56    | 8     | 64  | 3     | 3     | 1     | 1     |
| <b>block2.1.2</b> | 56    | 8     | 64  | 3     | 3     | 1     | 1     |
| <b>block2.2.1</b> | 56    | 8     | 64  | 3     | 3     | 1     | 1     |
| <b>block2.2.2</b> | 56    | 8     | 64  | 3     | 3     | 1     | 1     |
| <b>block3.1.1</b> | 28    | 4     | 128 | 3     | 3     | 2     | 2     |
| <b>block3.1.2</b> | 28    | 4     | 128 | 3     | 3     | 1     | 1     |
| <b>block3.2.1</b> | 28    | 4     | 128 | 3     | 3     | 1     | 1     |
| <b>block3.2.2</b> | 28    | 4     | 128 | 3     | 3     | 1     | 1     |
| <b>block4.1.1</b> | 14    | 2     | 256 | 3     | 3     | 2     | 2     |
| <b>block4.1.2</b> | 14    | 2     | 256 | 3     | 3     | 1     | 1     |
| <b>block4.2.1</b> | 14    | 2     | 256 | 3     | 3     | 1     | 1     |
| <b>block4.2.2</b> | 14    | 2     | 256 | 3     | 3     | 1     | 1     |
| <b>block5.1.1</b> | 7     | 1     | 512 | 3     | 3     | 2     | 2     |
| <b>block5.1.2</b> | 7     | 1     | 512 | 3     | 3     | 1     | 1     |
| <b>block5.2.1</b> | 7     | 1     | 512 | 3     | 3     | 1     | 1     |
| <b>block5.2.2</b> | 7     | 1     | 512 | 3     | 3     | 1     | 1     |
| <b>max-pool</b>   | 1     | 1     | 512 | 7     | 2     | 1     | 1     |
| <b>fc1</b>        | -     | -     | 512 | -     | -     | -     | -     |
| <b>fc2</b>        | -     | -     | 512 | -     | -     | -     | -     |
| <b>fc3</b>        | -     | -     | 128 | -     | -     | -     | -     |

| Audio Network   |       |       |     |       |       |       |       |
|-----------------|-------|-------|-----|-------|-------|-------|-------|
| Layer           | $X_f$ | $X_t$ | $C$ | $K_f$ | $K_t$ | $S_f$ | $S_t$ |
| <b>audio</b>    | 257   | 200   | 1   | -     | -     | -     | -     |
| <b>conv1</b>    | 129   | 100   | 64  | 7     | 7     | 2     | 2     |
| <b>block2.1</b> | 65    | 50    | 64  | 3     | 3     | 2     | 2     |
| <b>block2.2</b> | 65    | 50    | 64  | 3     | 3     | 1     | 1     |
| <b>block3.1</b> | 33    | 25    | 128 | 3     | 3     | 2     | 2     |
| <b>block3.2</b> | 33    | 25    | 128 | 3     | 3     | 1     | 1     |
| <b>block4.1</b> | 17    | 13    | 256 | 3     | 3     | 2     | 2     |
| <b>block4.2</b> | 17    | 13    | 256 | 3     | 3     | 1     | 1     |
| <b>block5.1</b> | 17    | 13    | 512 | 3     | 3     | 1     | 1     |
| <b>block5.2</b> | 17    | 13    | 512 | 3     | 3     | 1     | 1     |
| <b>max pool</b> | 1     | 1     | 512 | 17    | 13    | 1     | 1     |
| <b>fc1</b>      | -     | -     | 512 | -     | -     | -     | -     |
| <b>fc2</b>      | -     | -     | 512 | -     | -     | -     | -     |
| <b>fc3</b>      | -     | -     | 128 | -     | -     | -     | -     |
